# Supplementary material
Source: PubMed Central journal article supplement (PMC4794006)
Supplement: luns021031.ww1_default.pdf [file luns021031.ww1_default.pdf]

Supplementary table 1. The occurrence of autism spectrum disorder in the National Patient Register in twins who were screen-positive for autism spectrum disorder in the Child and Adolescent Twin Study in Sweden, born 1st of January 1993- 31st of December 2002

| Number of individuals screen-positive in the Child and Adolescent Twin Study in Sweden that also had a diagnosis in the National Patient Register (95% CI:s) |                   |                  |                    |                    |                    |                    |                      |                     |                     |                     |
|--------------------------------------------------------------------------------------------------------------------------------------------------------------|-------------------|------------------|--------------------|--------------------|--------------------|--------------------|----------------------|---------------------|---------------------|---------------------|
| Total (% , 95% CI:s)                                                                                                                                         |                   |                  |                    |                    |                    |                    |                      |                     |                     |                     |
| 50/190* (26,3%, 20-33)                                                                                                                                       |                   |                  |                    |                    |                    |                    |                      |                     |                     |                     |
| Annual estimates                                                                                                                                             |                   |                  |                    |                    |                    |                    |                      |                     |                     |                     |
|                                                                                                                                                              | 1993              | 1994             | 1995               | 1996               | 1997               | 1998               | 1999                 | 2000                | 2001                | 2002                |
| Screenpositive/<br>registered diagnosis*                                                                                                                     | 1/12              | 7/34             | 2/17               | 4/17               | 6/23               | 4/23               | 4/14                 | 9/14                | 5/13                | 8/23                |
| Registered diagnosis**<br>(95% CI:s)                                                                                                                         | 8.3<br>(0.0-24.4) | 20.6<br>(7.0-34) | 11.8<br>(2.0-35.6) | 23.5<br>(3.3-43.7) | 26.1<br>(8.1-44.0) | 17.4<br>(1.9-32.8) | 28.6<br>(4.9 - 52.2) | 64.3<br>(39.1-89.4) | 38.5<br>(12.0-64.9) | 34.8<br>(15.3-54.3) |

\* Individuals with a diagnosis in National Patient Register / that also were screen-positive in Child and Adolescent Twin Study in Sweden (cut-off  $\geq 8.5$ ).  
Diagnosis in the National Patient Register ascribed before their 10th birthday

\*\*Percentage of individuals screen-positive in Child and Adolescent Twin Study in Sweden who also had a diagnosis of autism spectrum disorder in the National Patient Register

Test for trend p-value p=.0172

Supplementary table 2. The prevalence of autism spectrum disorder in the National Patient Register in all Swedish twins born from first January 1993 to the 31 of December 2003. Diagnosis in the National Patient Register ascribed before their 10th birthday

| Prevalence of autism spectrum disorder in the National Patient Register in Twins* |           |          |           |           |           |           |            |            |            |           |
|-----------------------------------------------------------------------------------|-----------|----------|-----------|-----------|-----------|-----------|------------|------------|------------|-----------|
| Total n (prevalence , 95% CI:s)<br>n = 107 (0,53%, ,43-63)                        |           |          |           |           |           |           |            |            |            |           |
| Annual prevalence                                                                 |           |          |           |           |           |           |            |            |            |           |
|                                                                                   | 1993      | 1994     | 1995      | 1996      | 1997      | 1998      | 1999       | 2000       | 2001       | 2002      |
| n                                                                                 | 2,984     | 2,772    | 2716      | 2,556     | 2,644     | 2,622     | 2,736      | 2,586      | 2,704      | 2,643     |
| Registered diagnosis*                                                             | 0.17      | .51      | .26       | .55       | .53       | .50       | .69        | .97        | .89        | .41       |
| (95% CI:s)                                                                        | (.02-.31) | (02-.77) | (.07-.45) | (.26-.83) | (.25-.81) | (.23-.76) | (.38-1.01) | (.59-1.34) | (.53-1.24) | (.17-.66) |

\* Test for trend p-value =.0004

Supplementary table 3. Mean scores of the three modules constituting the autism-score

| Mean scores (95% CI:s)             |                                     |                  |                  |                  |                  |                  |                  |                  |                  |                  |
|------------------------------------|-------------------------------------|------------------|------------------|------------------|------------------|------------------|------------------|------------------|------------------|------------------|
|                                    | Language                            |                  |                  |                  |                  |                  |                  |                  |                  |                  |
|                                    | Social interaction)                 |                  |                  |                  |                  |                  |                  |                  |                  |                  |
|                                    | Restricted and repetitive behavior. |                  |                  |                  |                  |                  |                  |                  |                  |                  |
| Annual Estimates                   |                                     |                  |                  |                  |                  |                  |                  |                  |                  |                  |
|                                    | 1993                                | 1994             | 1995             | 1996             | 1997             | 1998             | 1999             | 2000             | 2001             | 2002             |
| Language/communication             | .27<br>(.24-.29)                    | .28<br>(.25-.30) | .24<br>(.22-.27) | .26<br>(.23-.29) | .23<br>(.20-.25) | .24<br>(.22-.27) | .25<br>(.22-.28) | .22<br>(.20-.27) | .24<br>(.22-.27) | .27<br>(.24-.30) |
| Social interaction                 | .24<br>(.22-.26)                    | .29<br>(.26-.33) | .26<br>(.24-.29) | .23<br>(.21-.26) | .25<br>(.23-.28) | .28<br>(.25-.31) | .28<br>(.25-.31) | .25<br>(.23-.28) | .25<br>(.23-.28) | .32<br>(.29-.35) |
| Restricted and repetitive behavior | .22<br>(.20-.25)                    | .27<br>(.24-.29) | .27<br>(.24-.29) | .22<br>(.20-.25) | .24<br>(.22-.27) | .26<br>(.23-.29) | .25<br>(.22-.27) | .20<br>(.21-.27) | .24<br>(.21-.27) | .27<br>(.24-.29) |



|                                                             |      |      |      |      |      |      |      |      |      |      |
|-------------------------------------------------------------|------|------|------|------|------|------|------|------|------|------|
| n                                                           | 2304 | 2136 | 2088 | 1950 | 2050 | 1864 | 2002 | 1846 | 1882 | 1934 |
| Registered diagnosis%                                       | .09  | .42  | .34  | .51  | .39  | .48  | .75  | .70  | .64  | .41  |
| (n)                                                         | (2)  | (9)  | (7)  | (10) | (8)  | (9)  | (15) | (13) | (12) | (8)  |
| Non-responders in Child and Adolescent Twin Study in Sweden |      |      |      |      |      |      |      |      |      |      |
| Total prevalence (95% CI:s)                                 |      |      |      |      |      |      |      |      |      |      |
| .77% (.56-.97)                                              |      |      |      |      |      |      |      |      |      |      |
| Annual estimate                                             |      |      |      |      |      |      |      |      |      |      |
| n                                                           | 680  | 636  | 628  | 606  | 594  | 758  | 734  | 740  | 822  | 720  |
| Registered diagnosis %                                      | .44  | .79  | .00  | .66  | 1.01 | .53  | .54  | 1.62 | 1.46 | .42  |
| (n)                                                         | (3)  | (5)  | (0)  | (4)  | (6)  | (4)  | (4)  | (12) | (12) | (3)  |
